# Supplementary material
Source: PubMed Central journal article supplement (PMC3032630)
Supplement: NIHMS264863-supplement-SIxtal.pdf [file NIHMS264863-supplement-SIxtal.pdf]

# Supplementary Material (ESI) for Organic & Biomolecular Chemistry  
# This journal is (c) The Royal Society of Chemistry 2010

data\_global

\_journal\_codен\_Cambridge 177  
\_journal\_volume ?  
\_journal\_page\_first ?  
\_journal\_year ?  
  
\_publ\_contact\_author\_name 'Tor, Yitzhak '  
\_publ\_contact\_author\_email ytor@ucsd.edu

\_publ\_section\_title

;  
Fluorescent nucleoside analogue  
displays enhanced emission upon pairing with guanine

;  
loop\_  
\_publ\_author\_name  
'Yu Xie'  
T.Maxson  
Y.Tor

# Attachment '- tor4lcif(XieTorOBC).txt'

data\_tor41

\_database\_code\_depnum\_ccdc\_archive 'CCDC 784395'  
#TrackingRef '- tor4lcif(XieTorOBC).txt'

\_audit\_creation\_method SHELXL-97  
\_chemical\_name\_systematic  
;  
?  
;  
\_chemical\_name\_common ADDTop  
\_chemical\_melting\_point ?  
\_chemical\_formula\_moiety ?  
\_chemical\_formula\_sum 'C13 H17 N3 O6'  
\_chemical\_formula\_weight 311.30

loop\_

\_atom\_type\_symbol  
\_atom\_type\_description  
\_atom\_type\_scат\_dispersion\_real  
\_atom\_type\_scат\_dispersion\_imag  
\_atom\_type\_scат\_source  
C C 0.0181 0.0091 'International Tables Vol C Tables 4.2.6.8 and 6.1.1.4'  
H H 0.0000 0.0000 'International Tables Vol C Tables 4.2.6.8 and 6.1.1.4'  
N N 0.0311 0.0180 'International Tables Vol C Tables 4.2.6.8 and 6.1.1.4'  
O O 0.0492 0.0322 'International Tables Vol C Tables 4.2.6.8 and 6.1.1.4'

\_symmetry\_cell\_setting Orthorhombic  
\_symmetry\_space\_group\_name\_H-M P2(1)2(1)2(1)

loop\_

\_symmetry\_equiv\_pos\_as\_xyz  
'x, y, z'  
'-x+1/2, -y, z+1/2'

'x+1/2, -y+1/2, -z'  
'-x, y+1/2, -z+1/2'

|                                 |                          |
|---------------------------------|--------------------------|
| _cell_length_a                  | 6.837(2)                 |
| _cell_length_b                  | 10.470(5)                |
| _cell_length_c                  | 18.506(6)                |
| _cell_angle_alpha               | 90.00                    |
| _cell_angle_beta                | 90.00                    |
| _cell_angle_gamma               | 90.00                    |
| _cell_volume                    | 1324.7(9)                |
| _cell_formula_units_Z           | 4                        |
| _cell_measurement_temperature   | 100(2)                   |
| _cell_measurement_reflms_used   | ?                        |
| _cell_measurement_theta_min     | ?                        |
| _cell_measurement_theta_max     | ?                        |
| _exptl_crystal_description      | needle                   |
| _exptl_crystal_colour           | colorless                |
| _exptl_crystal_size_max         | 0.15                     |
| _exptl_crystal_size_mid         | 0.02                     |
| _exptl_crystal_size_min         | 0.02                     |
| _exptl_crystal_density_meas     | ?                        |
| _exptl_crystal_density_diffn    | 1.561                    |
| _exptl_crystal_density_method   | 'not measured'           |
| _exptl_crystal_F_000            | 656                      |
| _exptl_absorpt_coefficient_mu   | 1.064                    |
| _exptl_absorpt_correction_type  | multi-scan               |
| _exptl_absorpt_correction_T_min | 0.8567                   |
| _exptl_absorpt_correction_T_max | 0.9790                   |
| _exptl_absorpt_process_details  | SADABS                   |
| _diffn_refl_scan_width          | 0.5                      |
| _diffn_refl_scan_rate           | 10                       |
| _space_group.centring_type      | primitive                |
| _space_group.IT_number          | 19                       |
| _exptl_special_details          |                          |
| ;                               |                          |
| ?                               |                          |
| ;                               |                          |
| _diffn_ambient_temperature      | 100(2)                   |
| _diffn_radiation_wavelength     | 1.54178                  |
| _diffn_radiation_type           | CuK\alpha                |
| _diffn_radiation_source         | 'fine-focus sealed tube' |
| _diffn_radiation_monochromator  | graphite                 |
| _diffn_measurement_device_type  | KappaApexII              |
| _diffn_measurement_method       | 'phi and omega scans'    |
| _diffn_reflms_number            | 6001                     |
| _diffn_reflms_av_R_equivalents  | 0.0245                   |
| _diffn_reflms_av_sigmaI/netI    | 0.0331                   |
| _diffn_reflms_limit_h_min       | -7                       |
| _diffn_reflms_limit_h_max       | 8                        |
| _diffn_reflms_limit_k_min       | -9                       |
| _diffn_reflms_limit_k_max       | 12                       |
| _diffn_reflms_limit_l_min       | -22                      |
| _diffn_reflms_limit_l_max       | 21                       |
| _diffn_reflms_theta_min         | 4.78                     |
| _diffn_reflms_theta_max         | 68.50                    |
| _reflms_number_total            | 2269                     |

\_reflns\_number\_gt 2037  
\_reflns\_threshold\_expression >2sigma(I)

\_computing\_data\_collection 'Bruker ApexII'  
\_computing\_cell\_refinement 'Bruker ApexII'  
\_computing\_data\_reduction 'Bruker SMART'  
\_computing\_structure\_solution SIR-2004  
\_computing\_structure\_refinement SHELXL-97  
\_computing\_molecular\_graphics ORTEP-32  
\_computing\_publication\_material WinGX

\_refine\_special\_details

;

Refinement of  $F^2$  against ALL reflections. The weighted R-factor wR and goodness of fit S are based on  $F^2$ , conventional R-factors R are based on F, with F set to zero for negative  $F^2$ . The threshold expression of  $F^2 > 2\sigma(F^2)$  is used only for calculating R-factors(gt) etc. and is not relevant to the choice of reflections for refinement. R-factors based on  $F^2$  are statistically about twice as large as those based on F, and R-factors based on ALL data will be even larger.

;

\_refine\_ls\_structure\_factor\_coef Fsqd  
\_refine\_ls\_matrix\_type full  
\_refine\_ls\_weighting\_scheme calc  
\_refine\_ls\_weighting\_details  
'calc w=1/[\s^2^(Fo^2^)+(0.0581P)^2^+0.0000P] where P=(Fo^2^+2Fc^2^)/3'  
\_atom\_sites\_solution\_primary direct  
\_atom\_sites\_solution\_secondary difmap  
\_atom\_sites\_solution\_hydrogens geom  
\_refine\_ls\_hydrogen\_treatment mixed  
\_refine\_ls\_extinction\_method SHELXL  
\_refine\_ls\_extinction\_coef 0.0033(5)  
\_refine\_ls\_extinction\_expression  $Fc^{**} = kFc [1 + 0.001x Fc^2 \cdot l^3 / \sin(2\backslash q)]^{-1/4}$   
\_refine\_ls\_abs\_structure\_details 'Flack H D (1983), Acta Cryst. A39, 876-881'  
\_refine\_ls\_abs\_structure\_Flack -0.2(2)  
\_chemical\_absolute\_configuration ad  
\_refine\_ls\_number\_reflns 2269  
\_refine\_ls\_number\_parameters 208  
\_refine\_ls\_number\_restraints 0  
\_refine\_ls\_R\_factor\_all 0.0409  
\_refine\_ls\_R\_factor\_gt 0.0358  
\_refine\_ls\_wR\_factor\_ref 0.0910  
\_refine\_ls\_wR\_factor\_gt 0.0882  
\_refine\_ls\_goodness\_of\_fit\_ref 1.059  
\_refine\_ls\_restrained\_S\_all 1.059  
\_refine\_ls\_shift/su\_max 0.000  
\_refine\_ls\_shift/su\_mean 0.000

loop\_

\_atom\_site\_label  
\_atom\_site\_type\_symbol  
\_atom\_site\_fract\_x  
\_atom\_site\_fract\_y  
\_atom\_site\_fract\_z  
\_atom\_site\_U\_iso\_or\_equiv  
\_atom\_site\_adp\_type  
\_atom\_site\_occupancy  
\_atom\_site\_symmetry\_multiplicity  
\_atom\_site\_calc\_flag

```

_atom_site_refinement_flags
_atom_site_disorder_assembly
_atom_site_disorder_group
C1 C 0.6260(3) 0.85690(18) 0.01043(11) 0.0158(4) Uani 1 1 d . . .
C2 C 0.6379(3) 0.84519(19) 0.08503(11) 0.0179(4) Uani 1 1 d . . .
H2 H 0.6483 0.9198 0.1140 0.022 Uiso 1 1 calc R . .
C3 C 0.6346(3) 0.72544(19) 0.11803(11) 0.0188(4) Uani 1 1 d . . .
C4 C 0.6201(3) 0.61478(19) 0.07447(12) 0.0195(4) Uani 1 1 d . . .
H4 H 0.6173 0.5325 0.0961 0.023 Uiso 1 1 calc R . .
C5 C 0.6100(3) 0.62722(19) 0.00076(12) 0.0180(4) Uani 1 1 d . . .
H5 H 0.6000 0.5525 -0.0281 0.022 Uiso 1 1 calc R . .
C6 C 0.6140(3) 0.7467(2) -0.03308(11) 0.0166(4) Uani 1 1 d . . .
C7 C 0.6088(3) 0.75658(18) -0.11061(11) 0.0163(4) Uani 1 1 d . . .
C8 C 0.6319(3) 0.98927(18) -0.09770(11) 0.0157(4) Uani 1 1 d . . .
C9 C 0.6385(3) 1.09785(19) 0.01676(11) 0.0167(4) Uani 1 1 d . . .
H101 H 0.6432 1.1700 -0.0186 0.020 Uiso 1 1 calc R . .
C10 C 0.4722(3) 1.1238(2) 0.07060(12) 0.0199(5) Uani 1 1 d . . .
H10A H 0.3708 1.1793 0.0489 0.024 Uiso 1 1 calc R . .
H10B H 0.4106 1.0430 0.0867 0.024 Uiso 1 1 calc R . .
C11 C 0.5747(3) 1.19108(18) 0.13362(11) 0.0162(4) Uani 1 1 d . . .
H11 H 0.5567 1.1414 0.1793 0.019 Uiso 1 1 calc R . .
C12 C 0.7923(3) 1.19400(19) 0.11207(11) 0.0159(4) Uani 1 1 d . . .
H12 H 0.8231 1.2794 0.0907 0.019 Uiso 1 1 calc R . .
C13 C 0.9361(3) 1.16672(19) 0.17246(11) 0.0180(5) Uani 1 1 d . . .
H13A H 1.0687 1.1567 0.1517 0.022 Uiso 1 1 calc R . .
H13B H 0.9390 1.2404 0.2060 0.022 Uiso 1 1 calc R . .
N1 N 0.6187(3) 0.87971(15) -0.13737(9) 0.0170(4) Uani 1 1 d . . .
H1 H 0.6162 0.8883 -0.1847 0.020 Uiso 1 1 calc R . .
N2 N 0.6296(3) 0.97765(15) -0.02370(9) 0.0158(4) Uani 1 1 d . . .
N3 N 0.6475(3) 0.71563(17) 0.19058(10) 0.0235(4) Uani 1 1 d . . .
H3A H 0.6579 0.7849 0.2172 0.028 Uiso 1 1 calc R . .
H3B H 0.6454 0.6400 0.2112 0.028 Uiso 1 1 calc R . .
O1 O 0.5974(2) 0.66558(13) -0.15316(8) 0.0205(3) Uani 1 1 d . . .
O2 O 0.6430(2) 1.09320(12) -0.12922(8) 0.0188(3) Uani 1 1 d . . .
O3 O 0.8156(2) 1.09857(13) 0.05751(8) 0.0176(3) Uani 1 1 d . . .
O4 O 0.5152(2) 1.32051(13) 0.14379(9) 0.0248(4) Uani 1 1 d . . .
H4A H 0.3937 1.3263 0.1379 0.037 Uiso 1 1 calc R . .
O5 O 0.8867(2) 1.05415(13) 0.21191(8) 0.0193(3) Uani 1 1 d . . .
H5A H 0.9394 0.9905 0.1923 0.029 Uiso 1 1 calc R . .
O6 O 0.6307(3) 0.46609(14) 0.26130(9) 0.0247(4) Uani 1 1 d . . .
H6B H 0.611(4) 0.413(2) 0.2242(15) 0.037 Uiso 1 1 d . . .
H6A H 0.722(4) 0.420(2) 0.2869(17) 0.037 Uiso 1 1 d . . .

```

loop\_

```

_atom_site_aniso_label
_atom_site_aniso_U_11
_atom_site_aniso_U_22
_atom_site_aniso_U_33
_atom_site_aniso_U_23
_atom_site_aniso_U_13
_atom_site_aniso_U_12
C1 0.0145(10) 0.0134(10) 0.0194(10) 0.0011(8) 0.0000(8) -0.0008(8)
C2 0.0207(10) 0.0165(10) 0.0166(10) -0.0002(8) 0.0013(8) 0.0004(9)
C3 0.0174(10) 0.0189(10) 0.0202(11) -0.0007(9) 0.0019(9) 0.0003(9)
C4 0.0194(10) 0.0144(9) 0.0246(11) 0.0038(8) 0.0009(9) -0.0010(9)
C5 0.0185(10) 0.0156(10) 0.0200(10) -0.0016(8) 0.0027(9) -0.0004(9)
C6 0.0159(10) 0.0158(10) 0.0181(10) 0.0003(8) 0.0015(8) -0.0007(9)
C7 0.0158(10) 0.0149(9) 0.0182(10) -0.0020(9) -0.0010(8) -0.0002(8)
C8 0.0151(10) 0.0150(10) 0.0169(10) -0.0006(8) -0.0007(8) -0.0005(9)
C9 0.0212(11) 0.0146(10) 0.0143(9) -0.0003(8) -0.0011(9) -0.0016(9)

```

C10 0.0213(11) 0.0189(11) 0.0195(11) -0.0007(9) -0.0002(9) 0.0011(9)  
 C11 0.0205(11) 0.0102(9) 0.0178(10) -0.0013(8) 0.0024(8) 0.0021(8)  
 C12 0.0218(11) 0.0132(9) 0.0127(10) -0.0019(8) 0.0016(8) -0.0012(8)  
 C13 0.0217(11) 0.0161(10) 0.0162(10) -0.0014(9) -0.0003(8) -0.0032(8)  
 N1 0.0234(9) 0.0168(8) 0.0108(8) -0.0012(7) 0.0012(7) -0.0005(8)  
 N2 0.0209(9) 0.0117(8) 0.0149(8) -0.0006(7) 0.0009(7) -0.0011(8)  
 N3 0.0366(11) 0.0165(9) 0.0175(9) 0.0031(7) 0.0013(8) -0.0001(8)  
 O1 0.0254(8) 0.0172(7) 0.0189(7) -0.0060(6) 0.0020(6) -0.0011(6)  
 O2 0.0241(8) 0.0152(7) 0.0169(7) 0.0013(6) 0.0000(6) -0.0012(6)  
 O3 0.0200(8) 0.0173(7) 0.0155(7) -0.0034(6) -0.0014(6) -0.0001(6)  
 O4 0.0232(8) 0.0160(7) 0.0351(9) -0.0065(7) -0.0043(7) 0.0058(6)  
 O5 0.0274(8) 0.0147(7) 0.0157(7) 0.0011(6) 0.0001(6) 0.0021(7)  
 O6 0.0340(9) 0.0176(7) 0.0226(8) -0.0008(6) -0.0026(7) 0.0026(7)

\_geom\_special\_details

;

All esds (except the esd in the dihedral angle between two l.s. planes)  
 are estimated using the full covariance matrix. The cell esds are taken  
 into account individually in the estimation of esds in distances, angles  
 and torsion angles; correlations between esds in cell parameters are only  
 used when they are defined by crystal symmetry. An approximate (isotropic)  
 treatment of cell esds is used for estimating esds involving l.s. planes.

;

loop\_

\_geom\_bond\_atom\_site\_label\_1

\_geom\_bond\_atom\_site\_label\_2

\_geom\_bond\_distance

\_geom\_bond\_site\_symmetry\_2

\_geom\_bond\_publ\_flag

C1 C2 1.388(3) . ?  
 C1 C6 1.410(3) . ?  
 C1 N2 1.413(3) . ?  
 C2 C3 1.395(3) . ?  
 C2 H2 0.9500 . ?  
 C3 N3 1.349(3) . ?  
 C3 C4 1.415(3) . ?  
 C4 C5 1.372(3) . ?  
 C4 H4 0.9500 . ?  
 C5 C6 1.399(3) . ?  
 C5 H5 0.9500 . ?  
 C6 C7 1.439(3) . ?  
 C7 O1 1.238(2) . ?  
 C7 N1 1.383(2) . ?  
 C8 O2 1.237(2) . ?  
 C8 N1 1.365(2) . ?  
 C8 N2 1.375(2) . ?  
 C9 O3 1.427(3) . ?  
 C9 N2 1.466(3) . ?  
 C9 C10 1.536(3) . ?  
 C9 H101 1.0000 . ?  
 C10 C11 1.532(3) . ?  
 C10 H10A 0.9900 . ?  
 C10 H10B 0.9900 . ?  
 C11 O4 1.427(2) . ?  
 C11 C12 1.541(3) . ?  
 C11 H11 1.0000 . ?  
 C12 O3 1.429(3) . ?  
 C12 C13 1.516(3) . ?  
 C12 H12 1.0000 . ?

C13 O5 1.427(2) . . ?  
C13 H13A 0.9900 . . ?  
C13 H13B 0.9900 . . ?  
N1 H1 0.8800 . . ?  
N3 H3A 0.8800 . . ?  
N3 H3B 0.8800 . . ?  
O4 H4A 0.8400 . . ?  
O5 H5A 0.8400 . . ?  
O6 H6B 0.89(3) . . ?  
O6 H6A 0.92(3) . . ?

loop\_

\_geom\_angle\_atom\_site\_label\_1  
\_geom\_angle\_atom\_site\_label\_2  
\_geom\_angle\_atom\_site\_label\_3  
\_geom\_angle

\_geom\_angle\_site\_symmetry\_1  
\_geom\_angle\_site\_symmetry\_3  
\_geom\_angle\_publ\_flag

C2 C1 C6 119.94(19) . . ?  
C2 C1 N2 121.49(18) . . ?  
C6 C1 N2 118.56(18) . . ?  
C1 C2 C3 120.92(19) . . ?  
C1 C2 H2 119.5 . . ?  
C3 C2 H2 119.5 . . ?  
N3 C3 C2 120.20(18) . . ?  
N3 C3 C4 120.60(19) . . ?  
C2 C3 C4 119.20(19) . . ?  
C5 C4 C3 119.48(19) . . ?  
C5 C4 H4 120.3 . . ?  
C3 C4 H4 120.3 . . ?  
C4 C5 C6 121.94(19) . . ?  
C4 C5 H5 119.0 . . ?  
C6 C5 H5 119.0 . . ?  
C5 C6 C1 118.51(19) . . ?  
C5 C6 C7 120.70(19) . . ?  
C1 C6 C7 120.79(19) . . ?  
O1 C7 N1 119.52(19) . . ?  
O1 C7 C6 125.44(19) . . ?  
N1 C7 C6 115.04(17) . . ?  
O2 C8 N1 119.33(18) . . ?  
O2 C8 N2 123.25(18) . . ?  
N1 C8 N2 117.42(17) . . ?  
O3 C9 N2 108.05(17) . . ?  
O3 C9 C10 106.55(17) . . ?  
N2 C9 C10 116.88(18) . . ?  
O3 C9 H101 108.4 . . ?  
N2 C9 H101 108.4 . . ?  
C10 C9 H101 108.4 . . ?  
C11 C10 C9 103.66(17) . . ?  
C11 C10 H10A 111.0 . . ?  
C9 C10 H10A 111.0 . . ?  
C11 C10 H10B 111.0 . . ?  
C9 C10 H10B 111.0 . . ?  
H10A C10 H10B 109.0 . . ?  
O4 C11 C10 113.99(17) . . ?  
O4 C11 C12 106.89(16) . . ?  
C10 C11 C12 104.71(17) . . ?  
O4 C11 H11 110.3 . . ?  
C10 C11 H11 110.3 . . ?

C12 C11 H11 110.3 . . ?  
O3 C12 C13 108.46(16) . . ?  
O3 C12 C11 106.07(16) . . ?  
C13 C12 C11 115.58(17) . . ?  
O3 C12 H12 108.8 . . ?  
C13 C12 H12 108.8 . . ?  
C11 C12 H12 108.8 . . ?  
O5 C13 C12 112.30(17) . . ?  
O5 C13 H13A 109.1 . . ?  
C12 C13 H13A 109.1 . . ?  
O5 C13 H13B 109.1 . . ?  
C12 C13 H13B 109.1 . . ?  
H13A C13 H13B 107.9 . . ?  
C8 N1 C7 126.46(17) . . ?  
C8 N1 H1 116.8 . . ?  
C7 N1 H1 116.8 . . ?  
C8 N2 C1 121.63(16) . . ?  
C8 N2 C9 115.61(16) . . ?  
C1 N2 C9 122.72(16) . . ?  
C3 N3 H3A 120.0 . . ?  
C3 N3 H3B 120.0 . . ?  
H3A N3 H3B 120.0 . . ?  
C9 O3 C12 106.39(15) . . ?  
C11 O4 H4A 109.5 . . ?  
C13 O5 H5A 109.5 . . ?  
H6B O6 H6A 100(2) . . ?

\_diffn\_measured\_fraction\_theta\_max 0.969  
\_diffn\_reflns\_theta\_full 67.00  
\_diffn\_measured\_fraction\_theta\_full 0.981  
\_refine\_diff\_density\_max 0.256  
\_refine\_diff\_density\_min -0.204  
\_refine\_diff\_density\_rms 0.056
